# Supplementary material for: What is the Best Radionuclide for Immuno-PET of Multiple Myeloma? A Comparison Study Between 89Zr- and 64Cu-Labeled Anti-CD138 in a Preclinical Syngeneic Model
Source: PubMed Central journal article supplement (PMC6567828; doi:10.3390/ijms20102564), 2019-05-24
Supplement: ijms-20-02564-s001.pdf [file ijms-20-02564-s001.pdf]

**Supplemental Data:**

**Table S1. Different PET imaging conducted in mice and lesions visualized on the different imaging methods**

|                                    | <b>Bioluminescence imaging</b> | <b><sup>18</sup>F-FDG-PET</b> | <b><sup>89</sup>Zr -DFO-9E7.4</b> | <b><sup>89</sup>Zr-oxalate</b> | <b><sup>64</sup>Cu-TE2A-9E7.4</b> |
|------------------------------------|--------------------------------|-------------------------------|-----------------------------------|--------------------------------|-----------------------------------|
| <b>Subcutaneous tumor model</b>    |                                |                               |                                   |                                |                                   |
| Mouse 1                            |                                | Sc x 1                        | Sc x 1                            |                                |                                   |
| Mouse 2                            |                                | Sc x 1,                       | Sc x 1,                           |                                |                                   |
| Mouse 3                            |                                | Sc x 1                        | Sc x 1                            |                                |                                   |
| Mouse 4                            |                                | Sc x 1                        | Sc x 1                            |                                |                                   |
| Mouse 5                            |                                | Sc x 1, Ln                    | Sc x 1, Ln                        |                                |                                   |
| Mouse 6                            |                                | Sc x 1                        | Sc x 1                            |                                |                                   |
| Mouse 7                            |                                | Sc x 1                        | Sc x 1                            |                                |                                   |
| Mouse 8                            |                                | Sc x 1,                       | Sc x 1,                           |                                |                                   |
| Mouse 9                            |                                | Sc x 1                        | Sc x 1                            |                                |                                   |
| Mouse 10                           |                                | Sc x 2                        |                                   | Sc x 2                         |                                   |
| Mouse 11                           |                                | Sc x 2                        |                                   | Sc x 2                         |                                   |
| Mouse 12                           |                                | Sc x 2                        |                                   | Sc x 2                         |                                   |
| <b>IV disseminated tumor model</b> |                                |                               |                                   |                                |                                   |
| Mouse 13                           | Sa, Mb                         | Sa, Mb                        | Sa, Mb                            |                                |                                   |
| Mouse 14                           | Sk, Mb                         | Mb                            | Sk, Mb                            |                                |                                   |
| Mouse 15                           | Mb                             | Mb                            | Mb                                |                                |                                   |
| Mouse 16                           | Sk, Mb                         | Sk, Mb                        | Sk, Mb                            |                                |                                   |
| Mouse 17                           | Sk, Sa, Iw, Mb                 | Sk, Sa, Iw, Mb                | Sk, Sa, Iw, Mb                    |                                |                                   |
| Mouse 18                           | Sk, Sp, Iw                     | Sk                            | Sk, Sp, Iw                        |                                | Sk, Sp, Iw                        |
| Mouse 19                           | Sk, Sa, Mb                     | Sk, Sa                        | Sk, Sa, Mb                        |                                | Sk, Sa, Mb                        |
| <b>Control mouse</b>               |                                |                               |                                   |                                |                                   |
| Mouse 20                           |                                |                               |                                   | N.S.                           |                                   |

Lesional territories: Sc: subcutaneous; Ln: lymph node; Sk: skull; Sa: Sacrum, Iw: iliac wing; Mb: member; Sp: spine.
